# Supplementary material
Source: PubMed Central journal article supplement (PMC4245168)
Supplement: cb500658w_si_004.pdf [file cb500658w_si_004.pdf]

| TRAP Name | Binding affinity for MEpSVD ( $K_d$ , $\mu\text{M}$ ) | Binding affinity for MESVD ( $K_d$ , $\mu\text{M}$ ) |
|-----------|-------------------------------------------------------|------------------------------------------------------|
| RR        | $2.08 \pm 0.20$                                       | $29.10 \pm 1.83$                                     |
| <b>RK</b> | <b><math>2.15 \pm 0.18</math></b>                     | <b><math>66.96 \pm 9.30</math></b>                   |
| KK        | $2.27 \pm 0.20$                                       | $45.32 \pm 4.53$                                     |
| KR        | $2.67 \pm 0.23$                                       | $26.12 \pm 2.11$                                     |
| TK        | $4.63 \pm 0.31$                                       | $48.21 \pm 3.43$                                     |
| RA        | $5.77 \pm 0.45$                                       | $71.40 \pm 9.61$                                     |
| TR        | $6.02 \pm 0.45$                                       | $53.02 \pm 6.61$                                     |
| KA        | $6.16 \pm 0.40$                                       | $46.68 \pm 9.05$                                     |
| TA        | $17.66 \pm 1.12$                                      | $99.41 \pm 26.78$                                    |
