# Supplementary material
Source: PubMed Central journal article supplement (PMC4245168)
Supplement: cb500658w_si_005.pdf [file cb500658w_si_005.pdf]

| Primer Name | Sequence                                            |
|-------------|-----------------------------------------------------|
| 2A_F_MGS    | ATATTAATGGGATCCAAGCAGGCACTGAAAGAAAAAGAGCTGGGG       |
| 2A_R_MGS    | CATCGAAAGCTTTAATTATCATTGCTCCTTCAGGATTTTCTCTGCCTGCTG |
| K2_K4_F     | GCAGAACACCGAAAGCCAAAAGTGCTCAAGAAATGC                |
| K2_K4_R     | GCATTTCTTGAGCACTTTTGGCTTTCGGTGTTCTGC                |
| R2_R4_F     | GCAGAACACCGACGCCACGTGTGCTCAAGAAATGC                 |
| R2_R4_R     | GCATTTCTTGAGCACACGTGGGCGTCGGTGTTCTGC                |
| K2_R4_F     | GCAGAACACCGAAAGCCACGTGTGCTCAAGAAATGC                |
| K2_R4_R     | GCATTTCTTGAGCACACGTGGCTTTCGGTGTTCTGC                |
| K2_A4_F     | GCAGAACACCGAAAGCCAGCAGTGCTCAAGAAATGC                |
| K2_A4_R     | GCATTTCTTGAGCACTGCTGGCTTTCGGTGTTCTGC                |
| 2A_T2R4_F   | GCAGAACACCGAACCCACGTGTGCTCAAGAAATGC                 |
| 2A_T2R4_R   | GCATTTCTTGAGCACACGTGGGGTTCGGTGTTCTGC                |
| 2A_A2A4_F   | GCAGAACACCGAGCTCCAGCAGTGCTCAAGAAATGC                |
| 2A_A2A4_R   | GCATTTCTTGAGCACTGCTGGAGCTCGGTGTTCTGC                |
| 2A_R2A4_F   | GCAGAACACCGACGCCAGCTGTGCTCAAGAAATGC                 |
| 2A_R2A4_R   | GCATTTCTTGAGCACAGCTGGGCGTCGGTGTTCTGC                |
| 2A_T2A4_F   | GCAGAACACCGAACCCAGCTGTGCTCAAGAAATGC                 |
| 2A_T2A4_R   | GCATTTCTTGAGCACAGCTGGGGTTCGGTGTTCTGC                |
