# Supplementary material
Source: PubMed Central journal article supplement (PMC4245168)
Supplement: cb500658w_si_006.pdf [file cb500658w_si_006.pdf]

| Primer Name | Sequence                                                        |
|-------------|-----------------------------------------------------------------|
| A           | ATTATACTGCAGAGATCAATTCGCGCGGAAGG                                |
| B           | TTAAATCTCGAGGAGTTTGTAGAAACGCAAAAAGGCCATCC                       |
| C           | ATATATCTCGAGATTAATAATTAAGATCTTTCAAATATGTATCCGCTCATGAGACAATAACCC |
| D           | TAGTTACTGCAGGCTGCCTCGCGCGTTTCG                                  |
| E           | ATTAAGTCGACTCGCTCAGTGAACGAAAACCTCACG                            |
| F           | TATTTAGTCGACATCAGCGCTAGCGGAGTGTATACTGG                          |
| G           | TTAATACTGCAGTTAATAAGATGATCTTCTTGAGATCGTTTTGGTCTGCG              |
| H           | TATTAAGGTACCATGGCATCCGTGAGCAAGGGCGAGGAGG                        |
| I           | TATATTAAGCTTTTATCACTTGTACAGCTCGTCCATGCCG                        |
| J           | TAAATTCTCGAGTCCCTATCAGTGATAGAGATTGACATCC                        |
| K           | TTAATTAGATCTAGGGCGGCGGATTTGTCC                                  |
| L           | TAATATAAGCTTCATGGTACGCGTGCTGCCAGGCATCAAATAAAACGAAAGGCTCAGTCG    |
| M           | TATATAGCATGCTGCATAATGTGCCTGTCAAATGGACGAAG                       |
| N           | CGTCAGGTAGGATCCGCTAATCTTATGG                                    |
| O           | TTATTTGAGCTCTTGGCTGTTTTGGCGGATGAGAGAAG                          |
| P           | ACTCATGACGTCATTCCTCCTGTTAGC                                     |
| Q           | GCTAACAGGAGGAATGACGTCATGAGT                                     |
| R           | ATAATTGAGCTCTTATTTGTAGAGTTCATCCATGCCATGTGTAATC                  |
| S           | TATTTACCTAGGATCAGCGCTAGCGGAGTGTATACTGG                          |
| T           | ATATATCTCGAGTTCAAATATGTATCCGCTCATGAGACAATAACCC                  |
| U           | ATTAAGATCTTCGCTCAGTGAACGAAAACCTCACG                             |
| V           | TAAATTAGATCTTCCCTATCAGTGATAGAGATTGACATCC                        |
| W           | TTAATTCCTAGGAGGGCGGCGGATTTGTCC                                  |
