# Supplementary material
Source: PubMed Central journal article supplement (PMC4245168)

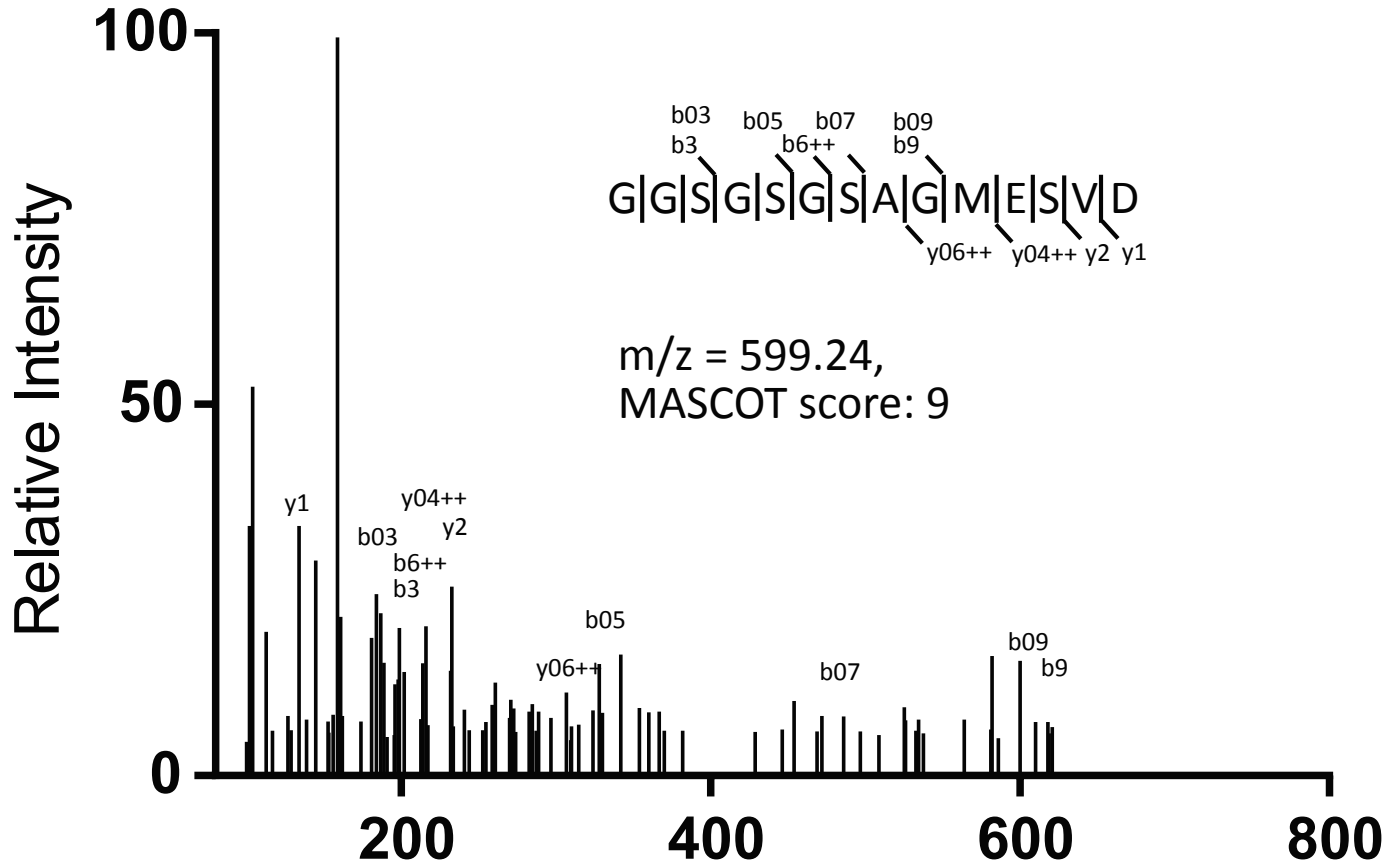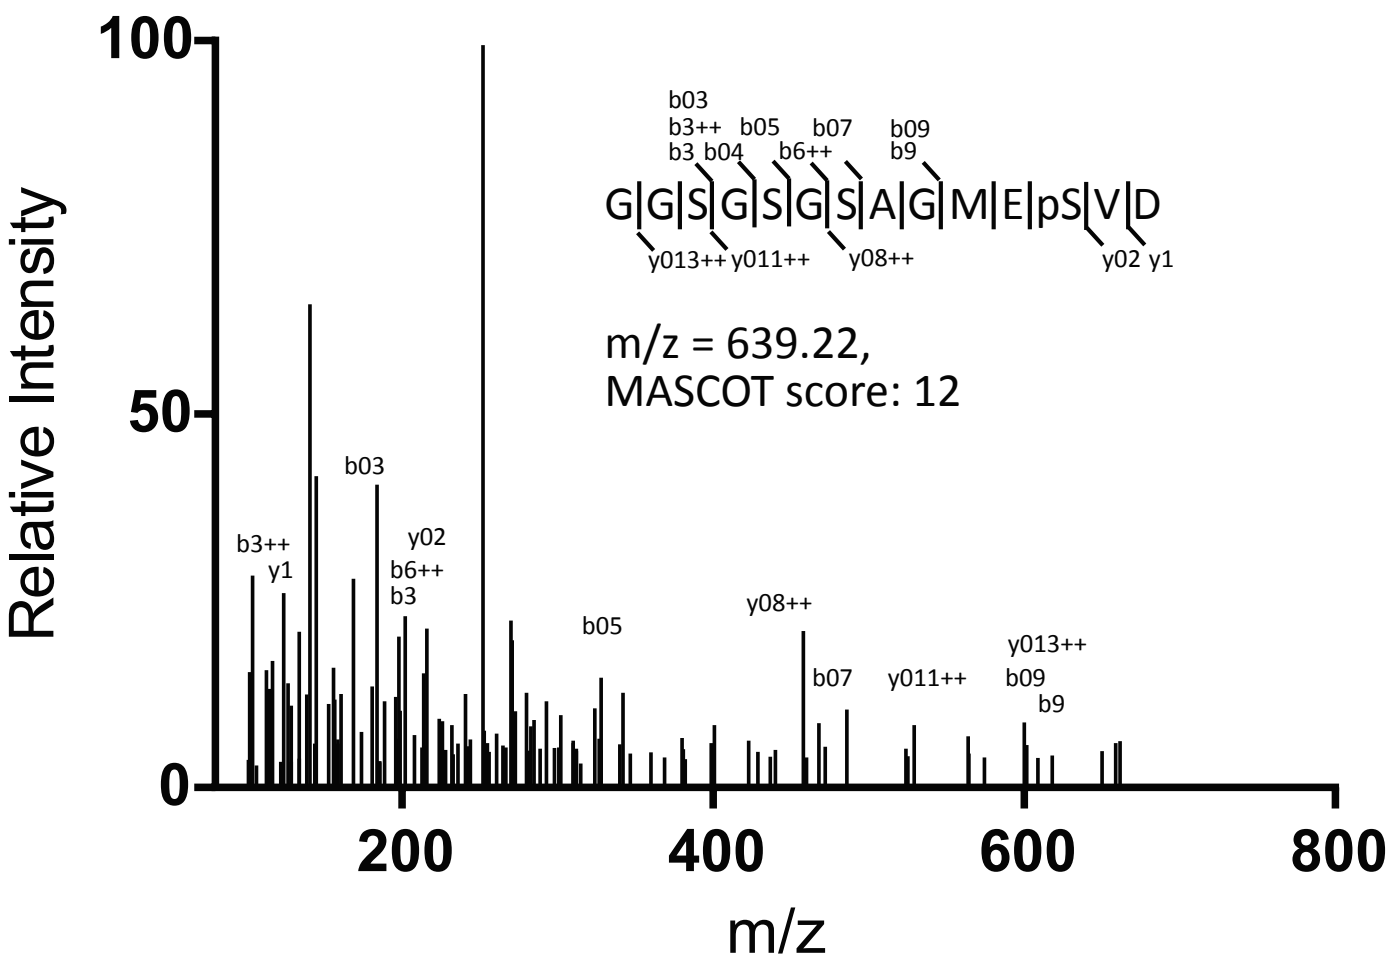

Supplement: cb500658w_si_002.pdf [file cb500658w_si_002.pdf]

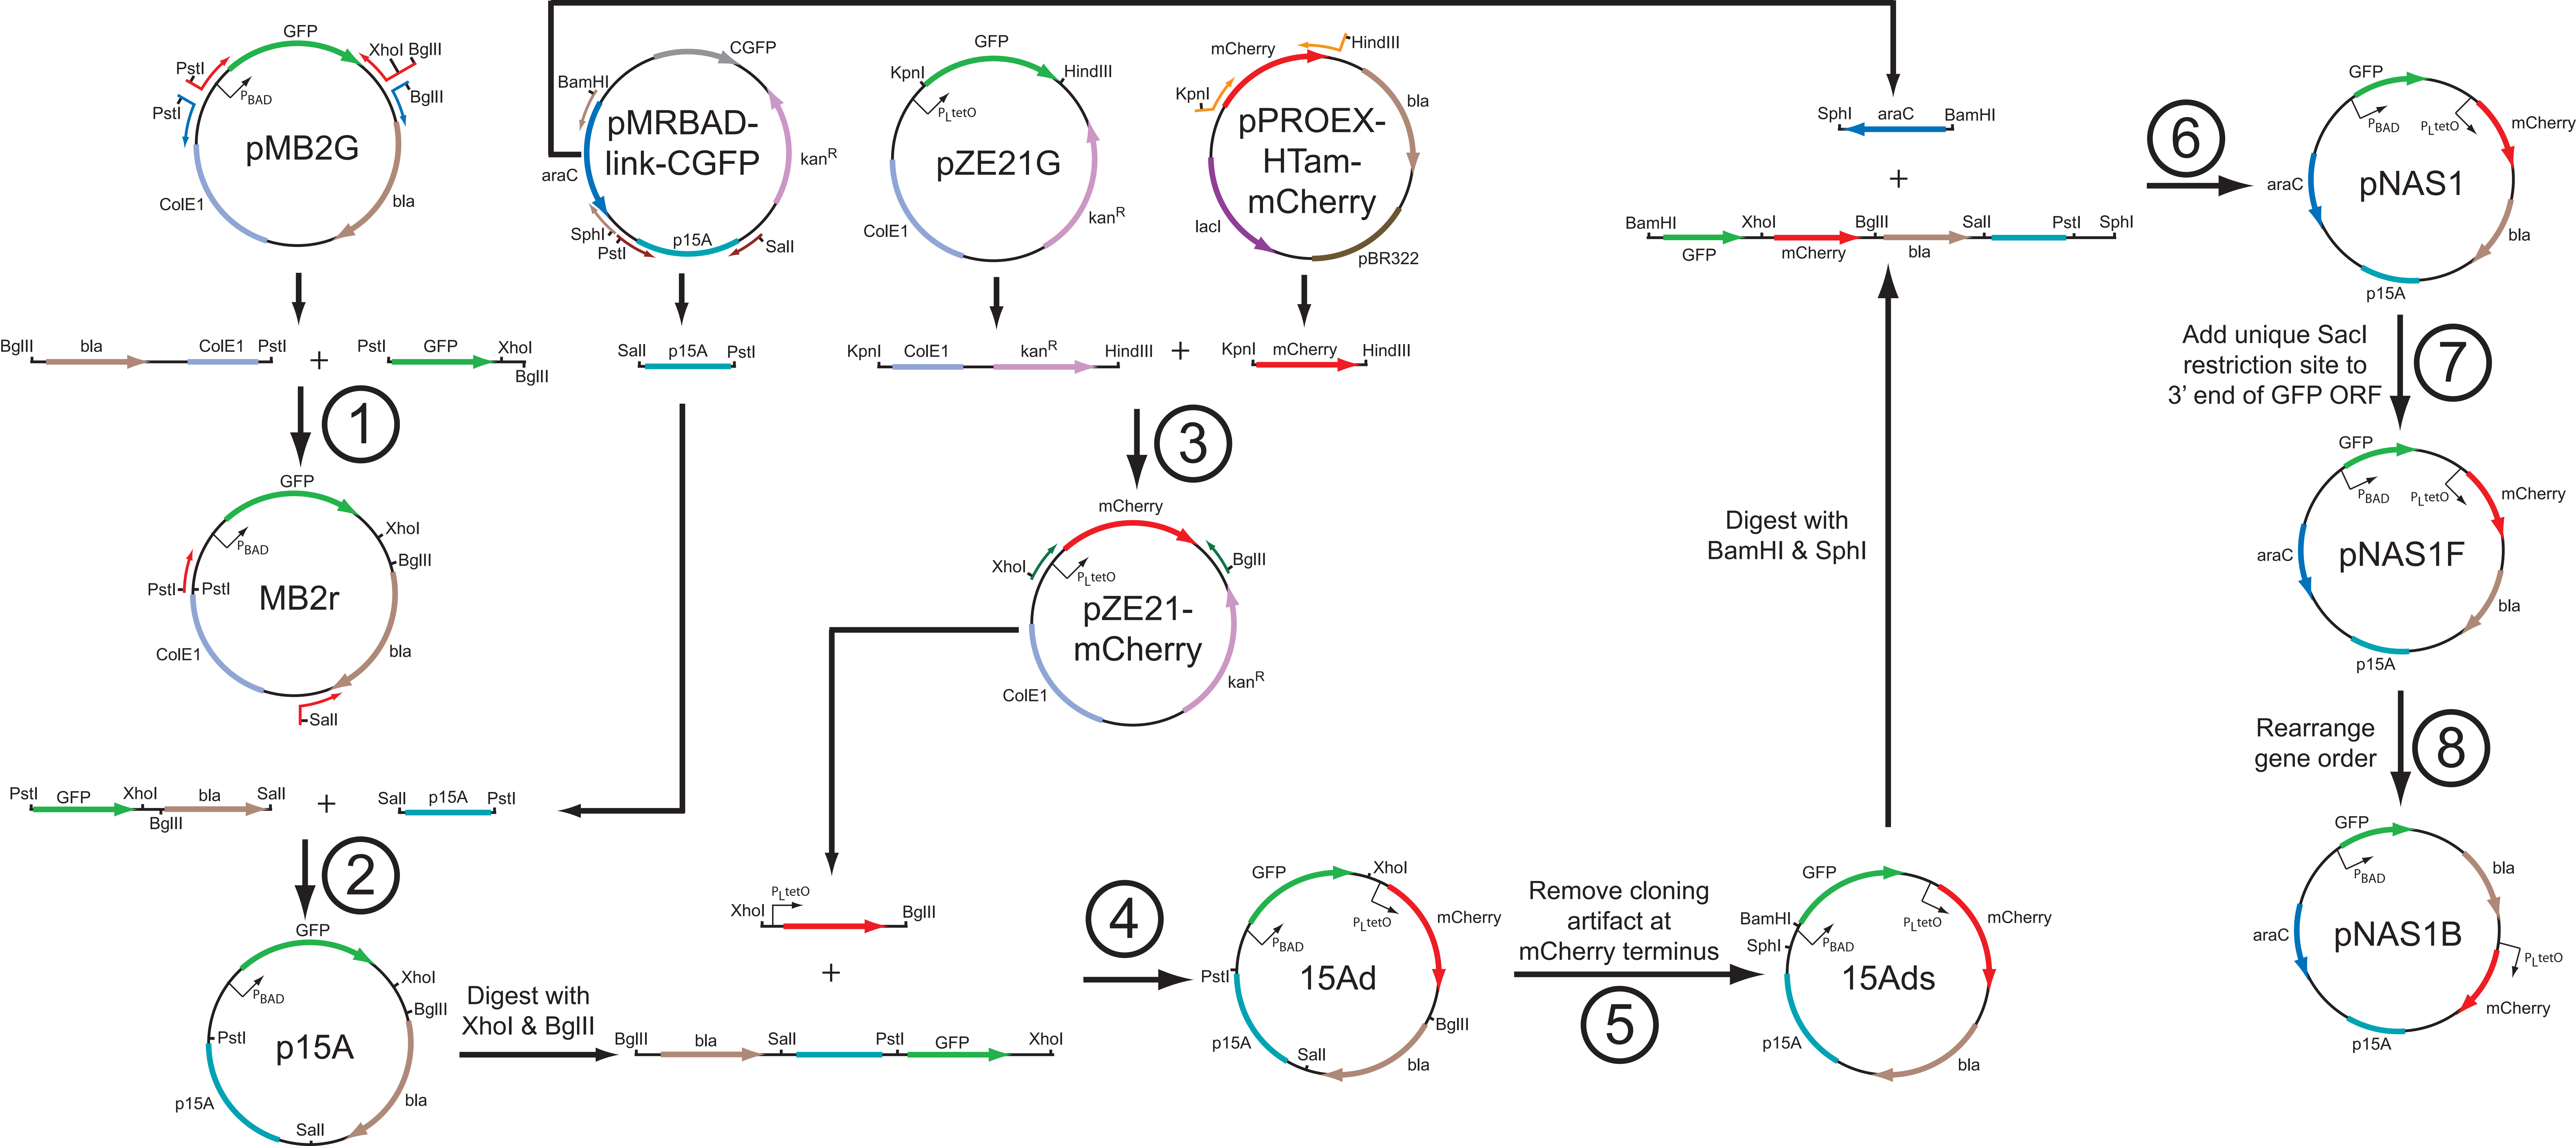

Supplement: cb500658w_si_003.pdf [file cb500658w_si_003.pdf]
